# Supplementary material for: MOF-derived Bi2O3@C microrods as negative electrodes for advanced asymmetric supercapacitors
Source: Royal Society of Chemistry journal article supplement (doi:10.1039/d0ra01470b), 2020-01-01
Supplement: d0ra01470b1.pdf [file d0ra01470b1.pdf]

## Supporting information

### MOF-Derived $\text{Bi}_2\text{O}_3@\text{C}$ microrods as negative electrodes for advanced asymmetric supercapacitors

Xianbo Yu<sup>a,b</sup>, Jie Sun<sup>a</sup>, Wen-Na Zhao<sup>b,\*</sup>, Shihang Zhao<sup>a</sup>, Hongmei Chen<sup>a</sup>, Kai Tao<sup>a</sup>,  
Yaoping Hu<sup>a</sup> and Lei Han<sup>a\*</sup>

<sup>a</sup> State Key Laboratory Base of Novel Functional Materials and Preparation Science, School of Materials Science & Chemical Engineering, Ningbo University, Ningbo 315211, China. E-mail: [hanlei@nbu.edu.cn](mailto:hanlei@nbu.edu.cn)

<sup>b</sup> Key Laboratory for Molecular Design and Nutrition Engineering of Ningbo, Ningbo Institute of Technology, Zhejiang University, Ningbo, Zhejiang 315100, China. E-mail: [wzhaoh@nit.zju.edu.cn](mailto:wzhaoh@nit.zju.edu.cn)

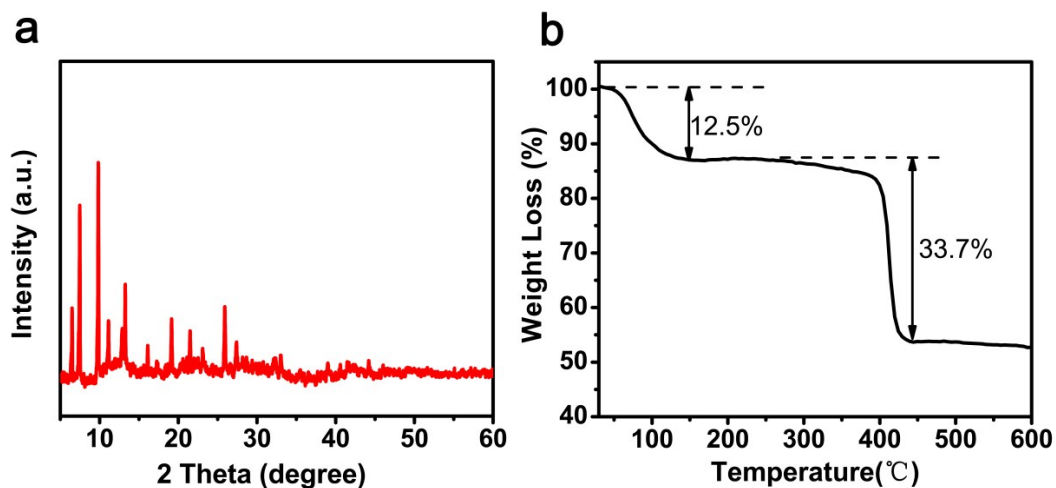

Figure S1. (a) XRD pattern of CAU-17 hexagonal prisms. (b) TGA characterizations of CAU-17.

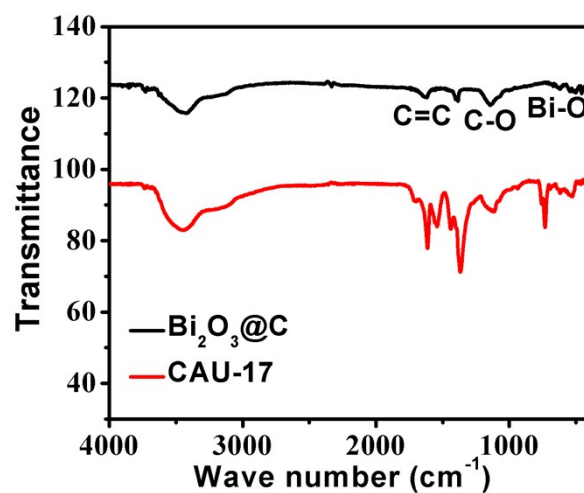

Figure S2. FT-IR spectrum of  $\text{Bi}_2\text{O}_3@\text{C}$  and CAU-17.

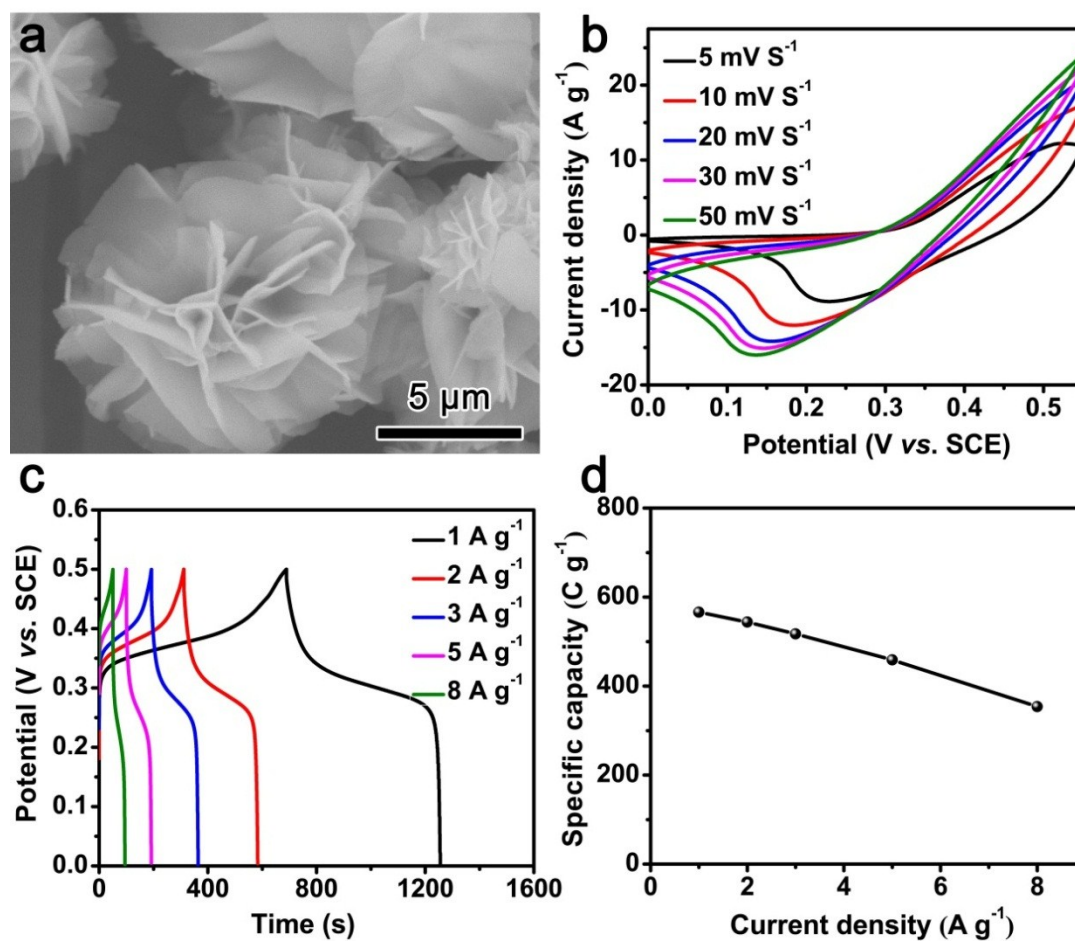

Figure S3. (a) SEM image of CoNi-LDH. (b) CV curves of CoNi-LDH electrode at different scan rates; (c) GCD curves of CoNi-LDH electrode at different current densities. (d) The specific capacity of CoNi-LDH.

**Table S1. Electrochemical performance of representative bismuth oxide electrodes**

| Electrode materials                                | Specific capacities    | Current density     | Refs      |
|----------------------------------------------------|------------------------|---------------------|-----------|
| <b>Bi<sub>2</sub>O<sub>3</sub>@C</b>               | 745 C g <sup>-1</sup>  | 2 A g <sup>-1</sup> | 1         |
| <b>3-D Bi<sub>2</sub>O<sub>3</sub></b>             | 447 C g <sup>-1</sup>  | 2 A g <sup>-1</sup> | 2         |
| <b>Bi<sub>2</sub>O<sub>3</sub> nanowires</b>       | 576 C g <sup>-1</sup>  | 2 A g <sup>-1</sup> | 3         |
| <b>Bi<sub>2</sub>O<sub>3</sub></b>                 | 920 C g <sup>-1</sup>  | 2 A g <sup>-1</sup> | 4         |
| <b>Bi<sub>2</sub>O<sub>3</sub>@MnO<sub>2</sub></b> | 70.2 C g <sup>-1</sup> | 2 A g <sup>-1</sup> | 5         |
| <b>β-Bi<sub>2</sub>O<sub>3</sub></b>               | 783 C g <sup>-1</sup>  | 2 A g <sup>-1</sup> | 6         |
| <b>Bi<sub>2</sub>O<sub>3</sub>@C</b>               | 937 C g <sup>-1</sup>  | 2 A g <sup>-1</sup> | This work |

#### References

1. Z. Zhao, Y. Ye, W. Zhu, L. Xiao, B. Deng and J. Liu, *Chin. Chem. Lett.*, 2018, **29**, 629-632.
2. N. M. Shinde, Q. X. Xia, J. M. Yun, R. S. Mane and K. H. Kim, *ACS Appl. Mater. Interfaces*, 2018, **10**, 11037-11047.
3. Y. Qiu, H. Fan, X. Chang, H. Dang, Q. Luo and Z. Cheng, *Appl. Surf. Sci.*, 2018, **434**, 16-20.
4. H. Su, S. Cao, N. Xia, X. Huang, J. Yan, Q. Liang and D. Yuan, *J. Appl. Electrochem.*, 2014, **44**, 735-740.
5. J. Ma, S. Zhu, Q. Shan, S. Liu, Y. Zhang, F. Dong and H. Liu, *Electrochim. Acta*, 2015, **168**, 97-103.
6. X.-J. Ma, W.-B. Zhang, L.-B. Kong, Y.-C. Luo and L. Kang, *Electrochim. Acta*, 2016, **192**, 45-51.
